# Supplementary material
Source: ML conference proceedings conference paper supplement (https://openaccess.thecvf.com/content/CVPR2026/html/Cao_StableMTL_Repurposing_Latent_CVPR_2026_paper.html)
Supplement: Supplementary file 1 [file Cao_StableMTL_Repurposing_Latent_CVPR_2026_supplemental.pdf]

# StableMTL: Repurposing Latent Diffusion Models for Multi-Task Learning from Partially Annotated Synthetic Datasets

–Supplementary Material–

Anh-Quan Cao<sup>1</sup> Ivan Lopes<sup>2</sup> Raoul de Charette<sup>2</sup>

<sup>1</sup>Valeo.ai <sup>2</sup>Inria

<https://github.com/astra-vision/StableMTL>

In this supplementary material, we report additional ablations of StableMTL in Sec. B.1. For our method and baselines in Sec. B.2 we report more metrics for **semantic**, **depth**, **shading** and **albedo**, and detail in-domain performances in Sec. B.3. Additionally, we describe our task encoding scheme in Sec. B.4, provide visualization details for each task in Sec. B.5, and detail the semantic class mapping used for training in Sec. B.6. Image resolutions are reported in Sec. B.7. Finally, we present further analyses regarding scalability in Sec. B.9, task-attention mechanisms in Sec. B.10, and computational costs in Sec. B.11.

We direct the reader to the **supplementary video** at <https://youtu.be/exsVFj34lrI> and Sec. B.8 for a qualitative assessment of our performance.

## B.1. Additional ablations

**Effect of task attention masking.** We ablate the task attention masking in Tab. 6. Masking a single task proportional to its attention weight (Sample( $\pi_T$ )) improves performance as the masking probability  $\rho$  increases to an optimum (*i.e.*,  $\rho=4$ ), as this fosters exploration of diverse task combinations. However, higher  $\rho$  values produces excessive exploration, lowering performance. Consequently, masking a random number of  $k$  tasks at once (Sample <sub>$k$</sub> ( $\pi_T$ )) is less effective. Other approaches are also suboptimal: dropping the highest-attention task (argmax) prevents exploitation of the strongest signal, while randomly dropping tasks ( $\mathcal{U}(\mathcal{T})$ ) offers a weaker exploration incentive.

## B.2. Additional metrics

We present IoU scores for each mapped class on the Cityscapes dataset [5] in Tab. 7, with class mapping details provided in Tab. 11. Overall, StableMTL ranks either first or second on all classes.

For **depth** evaluation on KITTI [7] and DIODE [12], additional depth metrics are reported in Tab. 8; these include

| Strategy                                     | Prob. ( $\rho$ ) | Semantic          |                    | Normal                |                       | Depth                  |                       | Opt. Flow         |                   | Scene Flow        |                   | Shading           |                   | Albedo                  |  | MTL Perf. |
|----------------------------------------------|------------------|-------------------|--------------------|-----------------------|-----------------------|------------------------|-----------------------|-------------------|-------------------|-------------------|-------------------|-------------------|-------------------|-------------------------|--|-----------|
|                                              |                  | mIoU % $\uparrow$ | mAE % $\downarrow$ | AbsRel % $\downarrow$ | AbsRel % $\downarrow$ | EPE-2D px $\downarrow$ | EPE-3D m $\downarrow$ | RMSE $\downarrow$ | $\Delta_m$ % $\uparrow$ |  |           |
|                                              |                  | Cityscapes        | DIODE              | KITTI                 | DIODE                 | KITTI                  | DIODE                 | KITTI             | KITTI             | MID               | MID               | MID               | MID               | Avg                     |  |           |
| Sample( $\pi_T$ )                            | 0.0              | 54.90             | 22.88              | 14.90                 | 32.57                 | 11.45                  | 0.2400                | 0.2351            | 0.2023            | +3.41             |                   |                   |                   |                         |  |           |
|                                              | 0.2              | 54.86             | 23.49              | 14.71                 | 32.61                 | 11.00                  | 0.2378                | 0.2349            | 0.2047            | +3.70             |                   |                   |                   |                         |  |           |
|                                              | 0.4              | 55.08             | 23.36              | 14.03                 | 32.97                 | 11.22                  | 0.2297                | 0.2350            | 0.2061            | +4.14             |                   |                   |                   |                         |  |           |
|                                              | 0.6              | 53.97             | 23.26              | 15.22                 | 32.94                 | 10.90                  | 0.2284                | 0.2348            | 0.2029            | +4.00             |                   |                   |                   |                         |  |           |
| Sample <sub><math>k</math></sub> ( $\pi_T$ ) | 0.4              | 52.95             | 23.02              | 14.73                 | 32.89                 | 11.21                  | 0.2386                | 0.2349            | 0.2093            | +2.72             |                   |                   |                   |                         |  |           |
|                                              | argmax           | 54.65             | 23.82              | 15.02                 | 33.15                 | 10.96                  | 0.2311                | 0.2338            | 0.2064            | +3.50             |                   |                   |                   |                         |  |           |
| $\mathcal{U}(\mathcal{T})$                   | idem             | 54.45             | 23.09              | 14.98                 | 32.87                 | 11.22                  | 0.2299                | 0.2339            | 0.2071            | +3.65             |                   |                   |                   |                         |  |           |
|                                              | idem             | 54.77             | 22.69              | 15.02                 | 32.70                 | 11.32                  | 0.2398                | 0.2313            | 0.2057            | +3.60             |                   |                   |                   |                         |  |           |

Table 6. **Ablation of attention masking.** Masking heads depending on their attention score using our distribution Sample( $\pi_T$ ) boosts performance by encouraging exploration. On the contrary, other methods, detailed in the text, perform worse. **Best** and **Second-best** are highlighted.

| Method               | road  | building | pole  | traffic light | traffic sign | vegetation | sky   | vehicle | mIoU  |
|----------------------|-------|----------|-------|---------------|--------------|------------|-------|---------|-------|
| Single-task baseline | 89.36 | 61.82    | 17.13 | 0.42          | 3.21         | 72.75      | 67.86 | 72.82   | 48.17 |
| JTR [11]             | 96.33 | 51.48    | 15.33 | 0.87          | 3.22         | 61.28      | 77.36 | 60.16   | 45.75 |
| JTR* [11]            | 71.50 | 0.00     | 0.00  | 0.00          | 0.00         | 38.69      | 53.47 | 0.00    | 20.46 |
| DiffusionMTL [14]    | 85.17 | 29.60    | 6.64  | 1.14          | 5.19         | 41.05      | 27.34 | 44.57   | 30.09 |
| DiffusionMTL* [14]   | 95.36 | 68.26    | 11.01 | 4.27          | 6.40         | 65.61      | 48.35 | 68.15   | 45.92 |
| StableMTL-S          | 92.06 | 67.05    | 16.76 | 2.03          | 6.31         | 72.53      | 83.84 | 80.06   | 52.57 |
| StableMTL            | 96.08 | 74.24    | 20.72 | 2.80          | 12.59        | 76.58      | 82.09 | 81.23   | 55.79 |

Table 7. **Per-class Semantic performance.** We report the IoU per mapped semantic class as well as the average IoU (mIoU), detailed in Tab. 11, on Cityscapes.

the following commonly used metrics [6]: absolute relative error (Abs Rel), squared relative error (Sq Rel), root mean squared error (RMSE), mean log<sub>10</sub> error (RMSE log), and threshold accuracies ( $\delta_1$ ,  $\delta_2$ ,  $\delta_3$ ). On most of these metrics, StableMTL surpasses all MTL baselines, only performing below the single-stream model StableMTL-S on one metric in one dataset.

We also report, in Tab. 9, metrics for **shading** and **albedo** on the MID dataset [10] following [3]: structural similarity index (SSIM) [13], local mean squared error (LMSE), and root mean squared error (RMSE). These results show our method outperforms all other MTL baselines.

| Method               | KITTI                |                     |                   |                       |                    |                    |                    |                      |                     | DIODE             |                       |                    |                    |                    |  |  |  |  |
|----------------------|----------------------|---------------------|-------------------|-----------------------|--------------------|--------------------|--------------------|----------------------|---------------------|-------------------|-----------------------|--------------------|--------------------|--------------------|--|--|--|--|
|                      | Abs Rel $\downarrow$ | Sq Rel $\downarrow$ | RMSE $\downarrow$ | RMSE log $\downarrow$ | $\delta 1\uparrow$ | $\delta 2\uparrow$ | $\delta 3\uparrow$ | Abs Rel $\downarrow$ | Sq Rel $\downarrow$ | RMSE $\downarrow$ | RMSE log $\downarrow$ | $\delta 1\uparrow$ | $\delta 2\uparrow$ | $\delta 3\uparrow$ |  |  |  |  |
| Single-task baseline | 14.21                | 0.7319              | 4.1734            | 0.2014                | 81.19              | 96.52              | 99.16              | 32.56                | 3.9233              | 3.9632            | 0.3163                | 73.72              | 87.72              | 93.11              |  |  |  |  |
| JTR [11]             | 26.39                | 1.7532              | 6.1357            | 0.2852                | 64.60              | 88.30              | 95.86              | 66.39                | 8.1448              | 8.4119            | 0.5482                | 42.26              | 67.66              | 81.59              |  |  |  |  |
| JTR* [11]            | 39.27                | 4.0532              | 9.1290            | 0.4301                | 42.99              | 73.19              | 88.00              | 73.14                | 9.2842              | 8.9962            | 0.5852                | 40.31              | 64.24              | 78.10              |  |  |  |  |
| DiffusionMTL* [14]   | 21.10                | 1.4998              | 5.8491            | 0.2715                | 68.11              | 89.87              | 96.80              | 45.19                | 4.6659              | 4.9657            | 0.4106                | 56.93              | 78.91              | 88.56              |  |  |  |  |
| DiffusionMTL* [14]   | 24.83                | 1.8492              | 6.4705            | 0.3518                | 58.77              | 86.54              | 95.59              | 58.17                | 7.2017              | 7.6032            | 0.5166                | 49.57              | 73.62              | 84.55              |  |  |  |  |
| StableMTL-S          | 15.64                | 0.8268              | 4.3713            | 0.2499                | 77.62              | 95.52              | 98.72              | 33.36                | 3.9504              | 4.0281            | 0.3227                | 73.42              | 87.17              | 92.62              |  |  |  |  |
| StableMTL            | 14.98                | 0.8224              | 4.3707            | 0.2170                | 79.43              | 95.94              | 98.87              | 33.03                | 3.9516              | 4.0073            | 0.3192                | 73.72              | 87.45              | 92.89              |  |  |  |  |

Table 8. **Additional depth metrics.** In all but one metric, StableMTL ranks first on both KITTI [7] and DIODE [12].

| Method               | Shading           |                 |                   | Albedo            |                 |                   |
|----------------------|-------------------|-----------------|-------------------|-------------------|-----------------|-------------------|
|                      | RMSE $\downarrow$ | SSIM $\uparrow$ | LMSE $\downarrow$ | RMSE $\downarrow$ | SSIM $\uparrow$ | LMSE $\downarrow$ |
| Single-task baseline | 0.2551            | 0.4277          | 0.0426            | 0.2145            | 0.6067          | 0.0505            |
| JTR* [11]            | 0.3030            | 0.1843          | 0.0530            | 0.3567            | 0.3102          | 0.0994            |
| DiffusionMTL* [14]   | 0.3064            | 0.3142          | 0.0487            | 0.3660            | 0.3606          | 0.1620            |
| StableMTL-S          | 0.2311            | 0.4449          | 0.0363            | 0.2077            | 0.6151          | 0.0496            |
| StableMTL            | 0.2346            | 0.4424          | 0.0366            | 0.2016            | 0.6199          | 0.0477            |

Table 9. **Additional shading and albedo metrics.** On MIDIntrinsics [10], StableMTL ranks either first or second; it is only surpassed by our single stream variant StableMTL-S.

### B.3. In-domain evaluation

Finally, we report the performances on test splits of in-domain data in Tab. 10. Our method beats all baselines by a large margin on all metrics.

| Method               | Semantic          |                    | Normal             |                       | Depth                 |                        | Opt. Flow              |                       | Scene Flow            |                   | Shading           |                   | Albedo            |                         | MTL Perf.               |     |
|----------------------|-------------------|--------------------|--------------------|-----------------------|-----------------------|------------------------|------------------------|-----------------------|-----------------------|-------------------|-------------------|-------------------|-------------------|-------------------------|-------------------------|-----|
|                      | mIoU % $\uparrow$ | mAE % $\downarrow$ | mAE % $\downarrow$ | AbsRel % $\downarrow$ | AbsRel % $\downarrow$ | EPE-2D ps $\downarrow$ | EPE-2D ps $\downarrow$ | EPE-3D m $\downarrow$ | EPE-3D m $\downarrow$ | RMSE $\downarrow$ | RMSE $\downarrow$ | RMSE $\downarrow$ | RMSE $\downarrow$ | $\Delta_m$ % $\uparrow$ | $\Delta_m$ % $\uparrow$ | Avg |
| Single-task baseline | 64.43             | 24.96              | 17.97              | 19.62                 | 17.76                 | 9.30                   | 12.87                  | 0.1508                | 0.4201                | 0.2205            | 0.2478            | 0.00              | 0.00              |                         |                         |     |
| DiffusionMTL* [14]   | 38.83             | 56.27              | 68.98              | 34.94                 | 34.20                 | 32.45                  | 32.52                  | 0.2630                | 0.7094                | 0.2866            | 0.5724            | -109.02           | -117.00           |                         |                         |     |
| JTR* [11]            | 36.36             | 51.68              | 54.73              | 66.23                 | 59.83                 | 32.29                  | 35.04                  | 0.3516                | 0.7454                | 0.2457            | 0.3865            | -117.00           | -117.00           |                         |                         |     |
| DiffusionMTL* [14]   | 51.63             | 27.13              | 23.65              | 29.94                 | 26.99                 | n/a                    | n/a                    | n/a                   | n/a                   | n/a               | n/a               | n/a               | n/a               |                         |                         |     |
| JTR [11]             | 42.21             | 29.56              | 30.47              | 35.38                 | 37.05                 | n/a                    | n/a                    | n/a                   | n/a                   | n/a               | n/a               | n/a               | n/a               |                         |                         |     |
| StableMTL-S          | 62.53             | 27.12              | 21.52              | 20.69                 | 20.25                 | 13.88                  | 21.10                  | 0.1611                | 0.5571                | 0.2021            | 0.2423            | -13.24            | -13.24            |                         |                         |     |
| StableMTL            | 67.98             | 25.39              | 19.30              | 19.11                 | 18.93                 | 9.44                   | 14.53                  | 0.1263                | 0.4382                | 0.2012            | 0.2366            | +1.56             | +1.56             |                         |                         |     |

Table 10. **In-domain model performance.** We compare the different approaches by evaluating on in-domain test sets.

### B.4. Task encoding

For unbounded quantities – **depth**, **optical flow**, and **scene flow** – we adopt affine-invariant representations as in [8]. Specifically, we apply independent linear scaling by mapping values from  $[a, b]$  to  $[-1, +1]$ . Where  $(a, b)$  are the 2nd/98th percentiles for **depth** and min/max values for **optical flow** and **scene flow**. For categorical tasks such as **semantic** segmentation, the annotations are discrete,  $y_{\text{seg}} \in \llbracket 1, C \rrbracket^{H \times W}$ , for  $C$  classes in total. We define a mapping  $f_{\text{seg}} : \llbracket 1, C \rrbracket \rightarrow [-1, +1]^3$  assigning a unique RGB vector to each class. Following [4], we tone-map **albedo** and **shading** with a scalar scale, then clamp and remap the values to  $[-1, +1]$ . After appropriate scaling, we standardize all shapes to match  $\mathbb{M}^3$  by repeating channels. For **depth** and **shading** (both in  $\mathbb{M}$ ), the grayscale maps are repeated three times. For **optical flow** ( $y_{\text{o-flow}} \in \mathbb{M}^2$ ), we choose to repeat the horizontal flow once. Finally **scene flow**, **normal**, and **albedo** already belong to  $\mathbb{M}^3$ .

As a post-processing step for **semantic** segmentation, we obtain final prediction  $\hat{y}_{\text{seg}}$  by first decoding the predicted latent with  $y'_{\text{seg}} = \mathcal{D}(\hat{z}_{\text{seg}})$ , then applying nearest neighbors

search in the RGB space for each pixel  $(i, j)$ :  $\hat{y}_{\text{seg}}(i, j) = \arg \min_{c \in \llbracket 1, C \rrbracket} \|\hat{y}'_{\text{seg}}(i, j) - f_{\text{seg}}(c)\|_2$ . For **optical flow**, the prediction consists of the first two channels of the decoded latent. For **depth** and **shading**, we utilize the average of the three decoded channels. Other tasks do not require any post-processing.

### B.5. Task Visualization

We detail here the visualization for each task. **Semantic** segmentation maps employ the Cityscapes color scheme (see Tab. 11). For **optical flow**  $\mathbf{v}(u, v) = (v_x, v_y)$ , we adopt the HSV color encoding from [2], where the lateral flow vector’s  $(v_x, v_y)$  angle  $\text{atan2}(-v_y, -v_x)$  determines hue and its magnitude  $\|(v_x, v_y)\|_2$  defines saturation, as illustrated in Fig. 12a. Similarly, **Scene Flow**  $\mathbf{v}(u, v) = (v_x, v_y, v_z)$  utilizes an HSV representation (cf. Fig. 12b): its lateral component  $(v_x, v_y)$  determines hue (angle:  $\text{atan2}(-v_y, -v_x)$ ) and saturation (magnitude:  $\|(v_x, v_y)\|_2$ ), while the depth flow component  $v_z$  is inversely mapped to value (brightness), with image-specific scaling applied to both the magnitude and  $v_z$ . For **normal** visualization, surface normal XYZ coordinates are directly mapped to RGB space. We predict outward-facing surface normals in OpenCV coordinate system following [1]. **Depth** visualization involves mapping scale-invariant depth values to the spectral color map before display. Finally, **shading** and **albedo** are directly visualized as grayscale and RGB images, respectively.

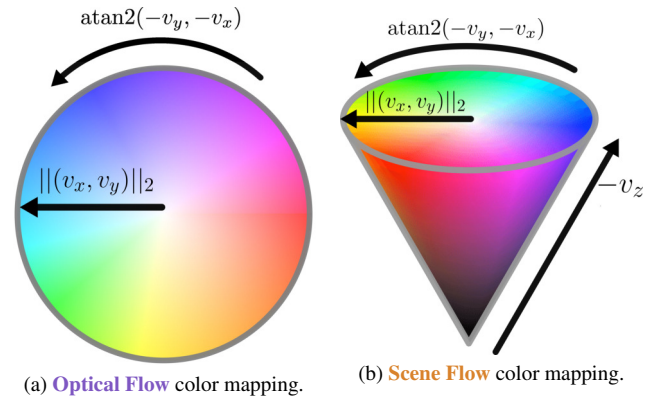

Figure 12. **Flow color mappings.** We visualize the mapping used to visualize (a) **optical flow** and (b) **scene flow**.

### B.6. Semantic class mapping

To allow evaluation of **semantic** on the Cityscapes dataset, our model is trained using only a subset of 8 classes, following the VKITTI  $2 \rightarrow$  Cityscapes class mapping from [9], detailed in Tab. 11.

| VKITTI 2   | ours          | Cityscapes | ours          | Color |
|------------|---------------|------------|---------------|-------|
| terrain    | <i>ignore</i> | road       | road          | ■     |
| sky        | sky           | sidewalk   | <i>ignore</i> | ■     |
| tree       | vegetation    | building   | building      | ■     |
| vegetation | vegetation    | wall       | vegetation    | ■     |
| building   | building      | fence      | <i>ignore</i> | ■     |
| road       | road          | pole       | pole          | ■     |
| guardrail  | <i>ignore</i> | light      | light         | ■     |
| sign       | sign          | sign       | sign          | ■     |
| light      | light         | vegetation | vegetation    | ■     |
| pole       | pole          | sky        | sky           | ■     |
| misc       | <i>ignore</i> | person     | <i>ignore</i> | ■     |
| truck      | vehicle       | rider      | <i>ignore</i> | ■     |
| car        | vehicle       | car        | vehicle       | ■     |
| van        | vehicle       | bus        | vehicle       | ■     |
|            |               | motorbike  | <i>ignore</i> | ■     |
|            |               | bike       | <i>ignore</i> | ■     |

Table 11. **Classes used for training.** We use a common set of 8 classes (ours), mapping together semantically similar classes of VKITTI 2 for proper evaluation of our model on Cityscapes.

## B.7. Image resolutions

We train the model on datasets using the following pixel resolutions,  $height \times width$ : Hypersim ( $288 \times 384$ ), FlyingThings3D ( $268 \times 480$ ), VKITTI2 ( $187 \times 621$ ).

For evaluations, we use the following resolutions: Cityscapes ( $256 \times 512$ ), DIODE ( $384 \times 512$ ), KITTI ( $176 \times 608$ ), MIDIntrinsics ( $256 \times 384$ ).

## B.8. Additional qualitative results

In Fig. 14 we report additional qualitative results of StableMTL, and the supplementary video further demonstrate the better of StableMTL compared to the existing baselines.

## B.9. Scalability of StableMTL

On a H100 GPU, Stage 1 (single-stream) trains in 10hr and Stage 2 (multi-stream) in 20hr. During inference, all tasks are batch-predicted in parallel. As tasks increase  $2 \rightarrow 7$ , compute ( $\sim 2.5 \rightarrow 7.7$  TFLOPs) and wall-clock ( $\sim 0.095 \rightarrow 0.18$ s) grow linearly though the latter has a much smaller slope, as shown in Fig. 13.

## B.10. N-to-1 vs. N-to-N task-attention

We conduct a comparison on (**Semantic**, **Normal**, **Depth**), where independently encoded tasks are concatenated and jointly processed to enable full N-to-N interactions, with supervision applied on all available labels. N-to-N incurs 50% higher memory and degrades performance (KITTI AbsRel  $13.92 \rightarrow 15.72$ , Normal MAE  $21.88 \rightarrow 22.95$ ), especially for

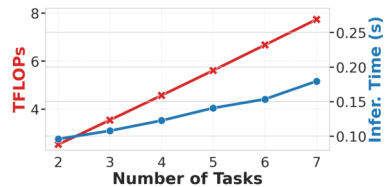

Figure 13. **Scalability of StableMTL.** Observing complexity (TFLOPs) and inference time (s) demonstrates that the latter increases slower than complexity when increasing the number of tasks, therefore showcasing scalability of our method.

| Method        | Time (ms) | TFLOPs | Memory (GB) | $\Delta_m$ (%) |
|---------------|-----------|--------|-------------|----------------|
| JTR*          | 0.006     | 0.07   | 0.92        | -106.87        |
| DiffusionMTL* | 0.110     | 2.89   | 25.69       | -78.76         |
| StableMTL-S   | 0.086     | 6.08   | 6.93        | -1.57          |
| StableMTL     | 0.179     | 7.73   | 11.75       | +4.78          |

Table 12. **Inference cost.**

semantics (mIoU  $51.03 \rightarrow 32.71$ ) which is further dominated, likely due to its smaller gradients (Fig. 6b).

## B.11. Compute cost

Tab. 12 reports H100 inference latency, TFLOPs, and GPU memory, for a  $256 \times 256$  image and 7 tasks. We adapt DiffusionMTL to scale to 7 tasks and upgrade the backbone (RN18 $\rightarrow$ RN101) to boost performance. JTR is kept unchanged because of its unconventional network. StableMTL-S runs in 0.086s and StableMTL in 0.179s for 7 tasks. Latent decoding drives 56% of costs; the U-Net takes only 21% as it operates in 4-channel latent space ( $\approx 64$  times smaller than image-space). StableMTL-S is 22% faster than DiffusionMTL, and StableMTL uses about half the memory (11.8 vs. 25.7GB) thanks to parallelized computation, despite higher TFLOPs.

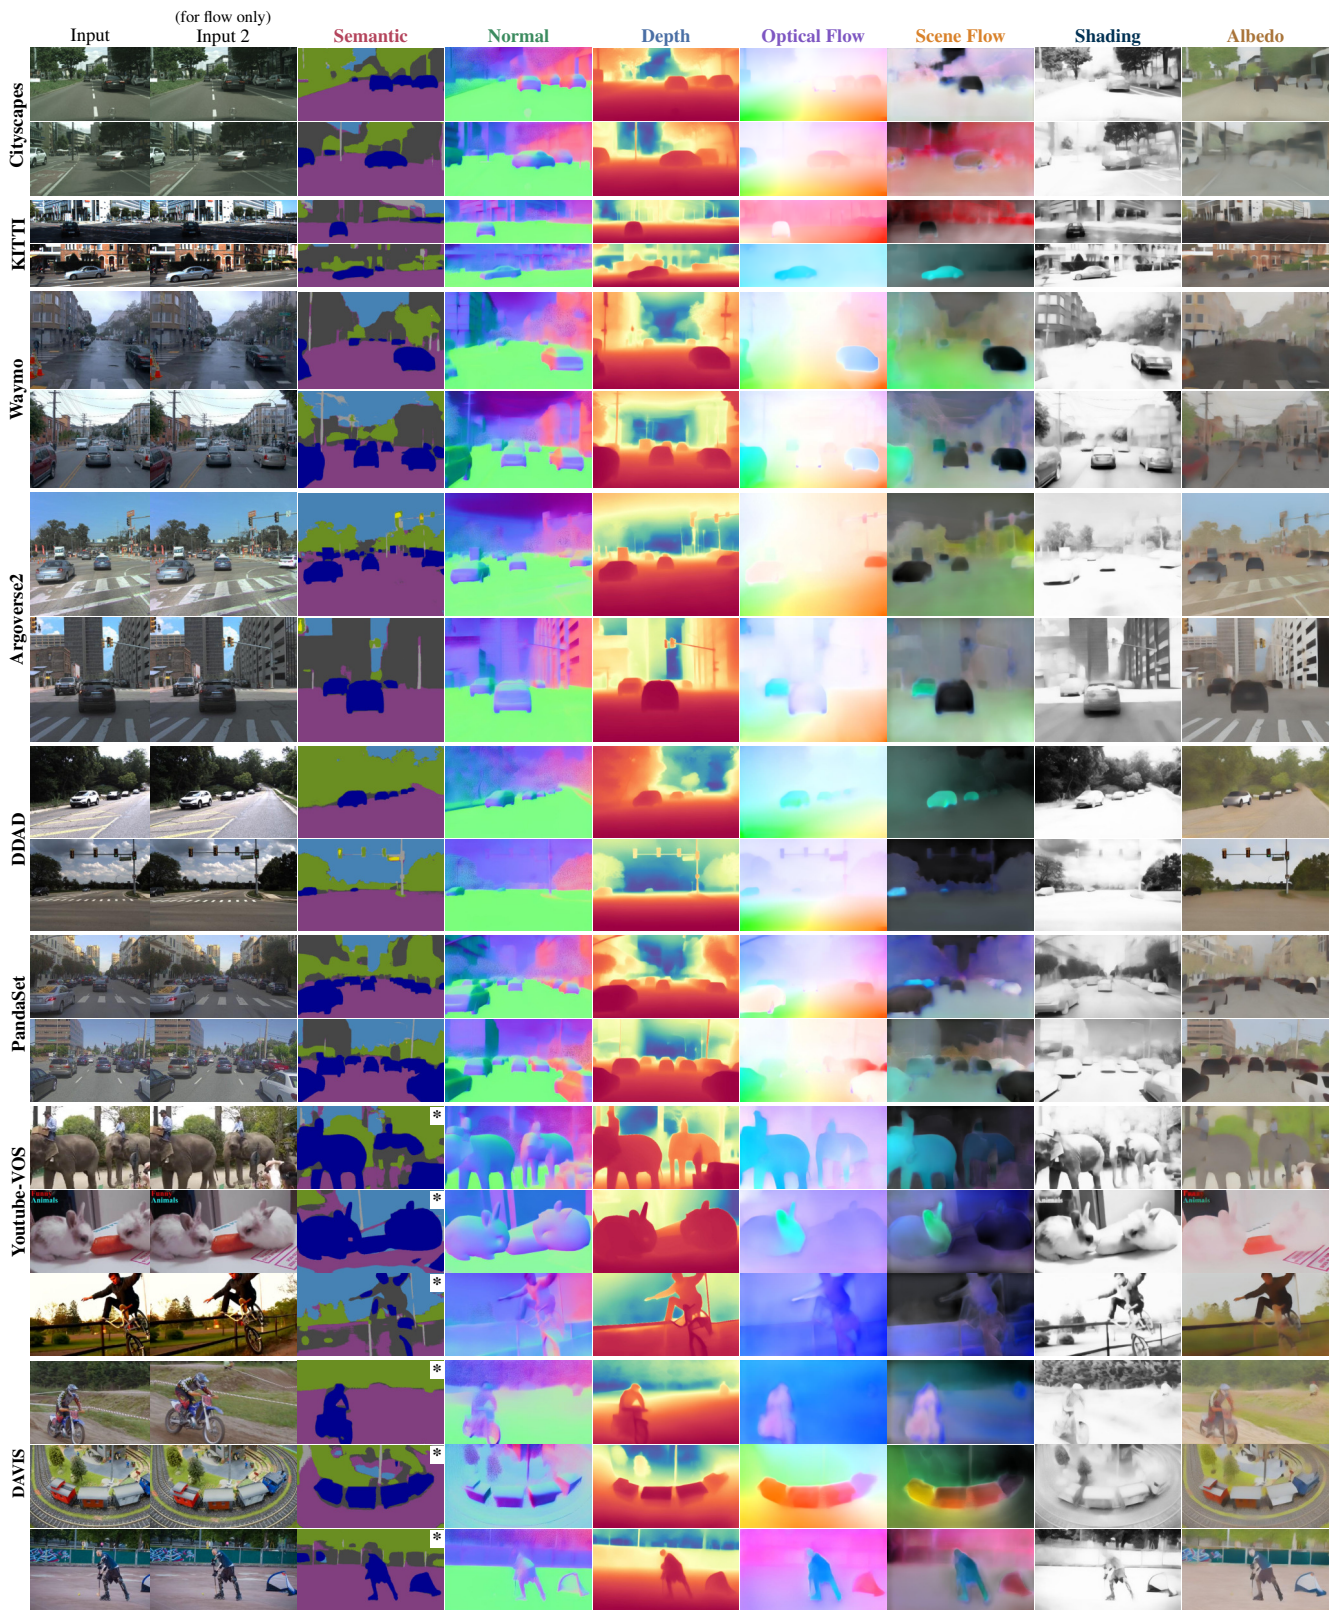

Figure 14. **Additional qualitative results on real-world data.** Despite being trained on partially annotated synthetic datasets, StableMTL demonstrates generalization to multi-task real-world scenarios. \*Note that **semantic** is trained on closed-set driving classes although it generalizes to some extent to other domains.

## References

- [1] Bae, G., Davison, A.J.: Rethinking inductive biases for surface normal estimation. In: CVPR (2024) [2](#)
- [2] Baker, S., Roth, S., Scharstein, D., Black, M.J., Lewis, J., Szeliski, R.: A database and evaluation methodology for optical flow. In: ICCV (2007) [2](#)
- [3] Careaga, C., Aksoy, Y.: Intrinsic image decomposition via ordinal shading. In: ACM TOG (2023) [1](#)
- [4] Careaga, C., Aksoy, Y.: Colorful diffuse intrinsic image decomposition in the wild. In: ACM TOG (2024) [2](#)
- [5] Cordts, M., Omran, M., Ramos, S., Rehfeld, T., Enzweiler, M., Benenson, R., Franke, U., Roth, S., Schiele, B.: The cityscapes dataset for semantic urban scene understanding. In: CVPR (2016) [1](#)
- [6] Eigen, D., Puhrsch, C., Fergus, R.: Depth map prediction from a single image using a multi-scale deep network. In: NeurIPS (2014) [1](#)
- [7] Geiger, A., Lenz, P., Urtasun, R.: Are we ready for autonomous driving? the kitti vision benchmark suite. In: CVPR (2012) [1](#), [2](#)
- [8] Ke, B., Obukhov, A., Huang, S., Metzger, N., Daut, R.C., Schindler, K.: Repurposing diffusion-based image generators for monocular depth estimation. In: CVPR (2024) [2](#)
- [9] Lopes, I., Vu, T.H., de Charette, R.: DenseMTL: Cross-task attention mechanism for dense multi-task learning. In: WACV (2023) [2](#)
- [10] Murmann, L., Gharbi, M., Aittala, M., Durand, F.: A multi-illumination dataset of indoor object appearance. In: ICCV (2019) [1](#), [2](#)
- [11] Nishi, K., Kim, J., Li, W., Pfister, H.: Joint-task regularization for partially labeled multi-task learning. In: CVPR (2024) [1](#), [2](#)
- [12] Vasiljevic, I., Kolkin, N., Zhang, S., Luo, R., Wang, H., Dai, F.Z., Daniele, A.F., Mostajabi, M., Basart, S., Walter, M.R., Shakhnarovich, G.: DIODE: A Dense Indoor and Outdoor DEpth Dataset. In: CoRR (2019) [1](#), [2](#)
- [13] Wang, Z., Bovik, A., Sheikh, H., Simoncelli, E.: Image quality assessment: from error visibility to structural similarity. In: TIP (2004) [1](#)
- [14] Ye, H., Xu, D.: DiffusionMTL: Learning multi-task denoising diffusion model from partially annotated data. In: CVPR (2024) [1](#), [2](#)
